# Supplementary material for: Multifunctional star-shaped polylactic acid implants for use in angioplasty
Source: Royal Society of Chemistry journal article supplement (doi:10.1039/c4tb00272e), 2014-01-01
Supplement: c4tb00272e1.pdf [file c4tb00272e1.pdf]

## Supporting Information

### Multifunctional star-shaped polylactic acid implant for potential use in angioplasty

Selvaraj Nagarajan,<sup>a,b</sup> M S Kiran,<sup>c</sup> John Tsibouklis<sup>d</sup> and Boreddy Siva Rami Reddy<sup>\*b</sup>

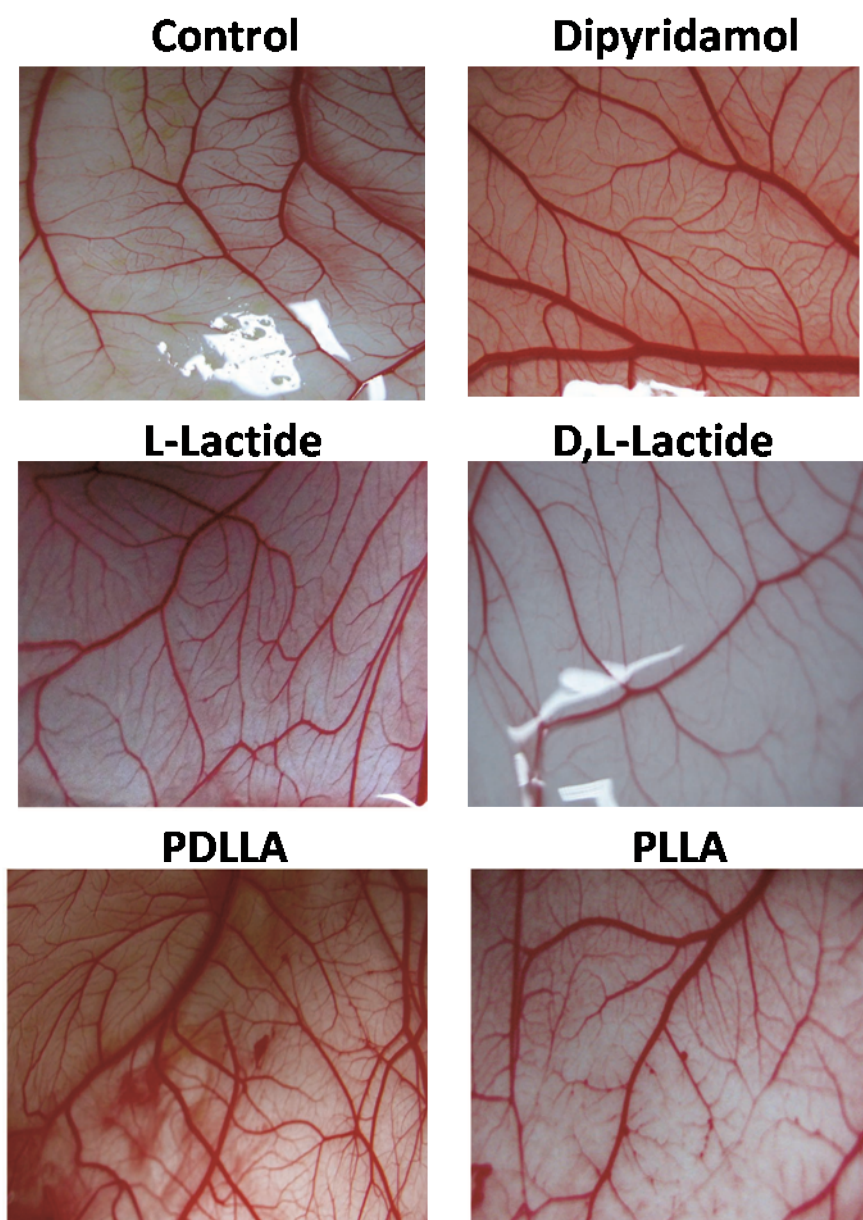

Fig.S1: Effect of PBS (Control), dipyridamole, L-lactide, D,L-lactide, PDLLA and PLLA with the branching points of 175, 240, 200, 90, 325 and 210 on CAM Assay.

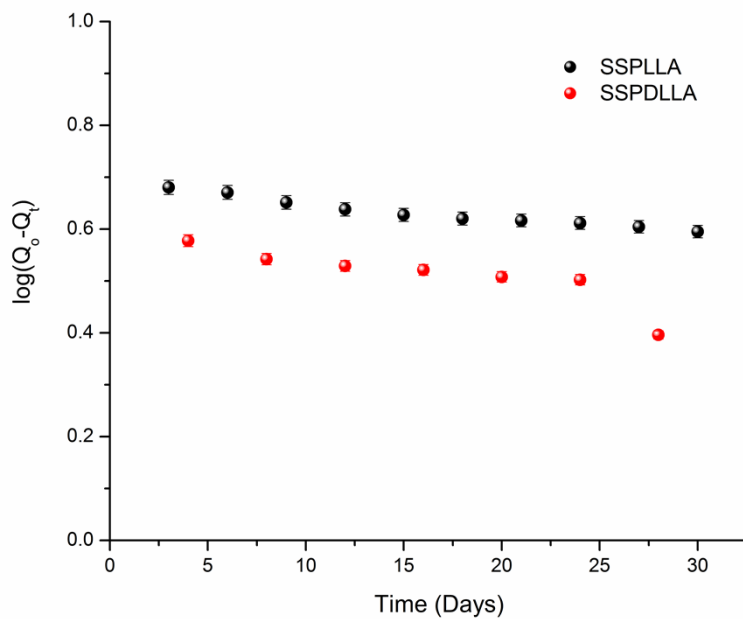

Fig.S2: First order hydrolysis plot of star shaped polylactic acids as function of time.

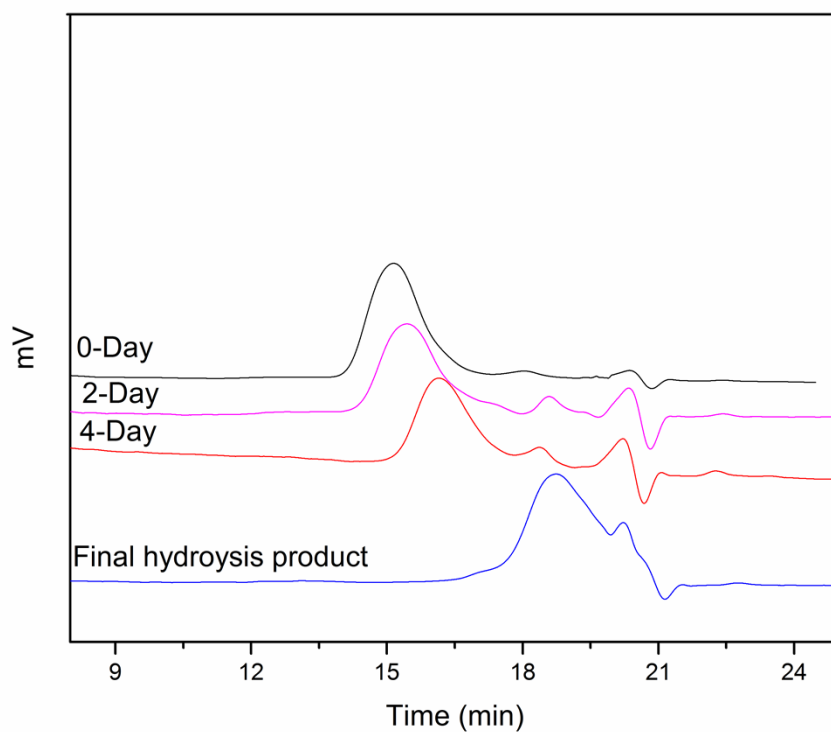

Fig.S3: Molecular weight difference of SSPDLLA on 0 day ( $\bar{M}_n=32,000$ ; PDI=1.35), 2 day ( $\bar{M}_n=24,572$ ; PDI=1.77), 4 day ( $\bar{M}_n=17,664$ ; PDI=1.55), and final hydrolysis product ( $\bar{M}_n = 762$ ).
